# Supplementary material
Source: HighWire-hosted journal article supplement (https://www.cmajopen.ca/content/suppl/2019/08/25/7.3.E537)

1 **Unplanned Hospitalization among Senior High Cost Healthcare Users in Ontario, Canada: population-based,**  
2 **matched cohort study**  
3  
4  
5

6 **AUTHORS:**

7 **Sergei Muratov MD, MPH<sup>1</sup>, Justin Lee BScPhm, ACPR, MD, FRCPC<sup>1,2</sup>, Anne Holbrook MD, PharmD, MSc, FRCPC<sup>1,3</sup>,**  
8 **J Michael Paterson MSc<sup>4,9</sup>, Jason R Guertin PhD<sup>5,6</sup>, Lawrence Mbuagbaw MD, MPH, PhD, FRSPH<sup>1</sup>, Tara Gomes**  
9 **PhD<sup>4,7</sup>, Wayne Khuu MSc<sup>4</sup>, Priscila Pequeno MSc<sup>4</sup>, Jean-Eric Tarride MA, PhD<sup>1,8</sup>**  
10  
11

12 <sup>1</sup>Department of Health Research Methods, Evidence, and Impact, McMaster University, Hamilton, Ontario, Canada  
13

14 <sup>2</sup>Division of Geriatric Medicine, Department of Medicine, McMaster University, Hamilton, Ontario, Canada  
15

16 <sup>3</sup>Division of Clinical Pharmacology and Toxicology, Department of Medicine, McMaster University, Hamilton,  
17 Ontario, Canada  
18

19 <sup>4</sup>ICES, Toronto, Ontario, Canada  
20

21 <sup>5</sup>Département de médecine sociale et préventive, Faculté de Médecine, Université Laval, Quebec City, Quebec,  
22 Canada  
23

24 <sup>6</sup>Centre de recherche du CHU de Québec, Université Laval, Axe Santé des Populations et Pratiques Optimales en  
25 Santé, Québec City, QC, Canada  
26

27 <sup>7</sup>Li Ka Shing Knowledge Institute, St. Michael's Hospital, Toronto, Ontario, Canada  
28

29 <sup>8</sup>Center for Health Economics and Policy Analysis (CHEPA), McMaster University, Hamilton, Ontario, Canada  
30

31 <sup>9</sup>Department of Family Medicine, McMaster University, Hamilton, Ontario, Canada  
32

33 **Corresponding author:**

34 Sergei Muratov  
35

36 Department of Clinical Epidemiology and Biostatistics, McMaster University  
37

38 1280 Main Street West, Hamilton, ON L8S 4K1  
39

40 [muratos@mcmaster.ca](mailto:muratos@mcmaster.ca)  
41

42 (905)523-7284  
43  
44  
45  
46  
47  
48  
49  
50  
51  
52  
53  
54  
55  
56  
57  
58  
59  
60

1 **Competing interests:** The authors declare that they have no competing interests  
2  
3  
4

5 **Funding and Acknowledgements:** This work is supported by in-kind support from the Ontario Drug Policy  
6  
7 Research Network (ODPRN) and by personnel awards from the Canadian Institutes of Health Research (CIHR) Drug  
8  
9 Safety and Effectiveness Cross-Disciplinary Training (DSECT) Program, the Program for Assessment of Technology  
10  
11 in Health (PATH), The Research Institute of St Joe's Hamilton, St Joseph's Healthcare Hamilton, and an Ontario  
12  
13 Graduate Scholarship (OGS). The work also is supported by ICES, an independent research institute funded by the  
14  
15 Ontario Ministry of Health and Long-Term Care (MOHLTC). ODPRN is funded by grants from the Ontario MOHLTC  
16  
17 and the Ontario Strategy for Patient-Orientated Research (SPOR) Support Unit, which is supported by CIHR and the  
18  
19 Province of Ontario. The opinions, results, and conclusions reported in this article are those of the authors and are  
20  
21 independent from the funding sources. No endorsement by ICES or the Ontario MOHLTC is intended or should be  
22  
23 inferred. Parts of this material are based on data and information compiled and provided by the Canadian  
24  
25 Institute for Health Information (CIHI) and Immigration, Refugees and Citizenship Canada (IRCC). However, the  
26  
27 analyses, conclusions, opinions and statements expressed herein are those of the authors and not necessarily  
28  
29 those of CIHI or IRCC.  
30  
31  
32  
33  
34  
35  
36  
37  
38  
39  
40  
41  
42  
43  
44  
45  
46  
47  
48  
49  
50  
51  
52  
53  
54  
55  
56  
57  
58  
59  
60

**ABSTRACT****BACKGROUND**

A better understanding of factors that influence the transition to high-cost user (HCU) status is needed. We examined the attributes of first (index) unplanned acute hospitalisation (IH) and its predictors among new senior HCUs compared to non-HCUs in Ontario.

**METHODS:**

Using Ontario administrative healthcare records, incident senior HCUs were identified and matched 1:3 to non-HCU seniors. HCUs were defined as persons aged  $\geq 66$  years within the top 5% most costly healthcare users during fiscal year (FY) 2013 but not during FY2012. IHs were defined as the first unplanned hospital admission during FY2013 with no hospitalizations in preceding 12 months. IH costs were calculated by most responsible ICD-10 diagnosis codes (MRDx). Predictors of IHs were identified using logistic regression.

**RESULTS:**

Over half (54.2%) of all HCUs (N=175,847) had an IH compared to 1.7% of non-HCUs (N=527,541). Ten MRDx accounted for one third of the IH costs. IH costs were higher for HCUs than for non-HCUs (mean, \$12,471 vs \$3,749), partly because of longer acute length of stay (mean, 7.5 vs 2.9 days) and more frequent designation as alternate level of care pre-discharge (20.8% vs. 1.7%). A lower risk of IH among HCUs was associated with residence in long-term care (LTC), attachment to a primary care provider, and recent consultation by a geriatrician.

**INTERPRETATION**

Unplanned IHs contribute to incident senior HCU conversion as suggested by IHs' prevalence and costs among HCUs compared with non-HCUs. Improved access to specialist outpatient care, home-based social care, and LTC when required are worth further investigation.

## Introduction

Senior high-cost users (HCUs), defined as those above 65 years of age, represent 60% of the overall HCU population which itself accounts for 61.1% of all publicly funded healthcare costs in Ontario(1). Approximately two-thirds of HCU costs are accrued through hospital admissions(1-4), thus providing the rationale for interventions aimed to reduce hospitalization rates (e.g., a “virtual ward”, “hot spotting”, discharge planning, bundled care, Ontario Health Links)(5-7). Detailed examination of hospitalized senior HCUs can inform and improve ongoing HCU management programs.

Currently, there is limited information on several key aspects of senior HCU admissions such as: 1) characteristics of incident HCUs, as opposed to prevalent HCUs, which would allow identification of the factors that influence the transition to HCU status; 2) the first hospital admission, as opposed to re-admission, since the first (or index) hospitalization is the most important predictor of subsequent admissions and of disability in general(8-10); 3) contribution of individual conditions to the financial burden of hospitalization, which would help programs identify clinical drivers of the highest inpatient expenditures that are potentially divertible by managing risk factors, and 4) outcomes of admission, such as inpatient mortality. Further, although socio-demographic and health attributes of senior HCUs have been reported in Canada and elsewhere(11-14), little is known about their healthcare prior to the HCU status, especially in Canada, and how these compare to non-HCUs. This is important, as preventing hospitalizations and improving outcomes among seniors, HCUs or non-HCUs, is likely to require a stronger effort on the part of community and ambulatory services (primary care, home care and outpatient specialist visits). Finally, it is also important to separate unplanned and elective hospitalizations to account for differences in patient characteristics, predictors, and preventability.

Given health care planners’ growing concern over the escalating healthcare costs and challenges in managing HCUs(5), a better characterization of the first unplanned hospitalizations among them is a timely exercise with important health policy and program implications. The objectives of the study were therefore to describe attributes of the first unplanned hospitalizations in the year of becoming an HCU among incident senior HCUs in comparison with non-HCUs, and to determine predictors of these admissions in both cohorts.

## Methods

### Ethics Approval

This study was approved by Hamilton Integrated Research Ethics Board (ID#1715-C).

### Study design and data sources

We conducted a retrospective population-based matched cohort study using 2 years of provincial patient data. The 2013 Ontario government fiscal year (April 1, 2013 and March 31, 2014) was considered the incident year (FY2013), while the 2012 fiscal year (FY2012: April 1, 2012 and March 31, 2013) was the baseline or pre-incident year. The individual level dataset was created using health administrative databases from Ontario housed at ICES ([www.ices.on.ca](http://www.ices.on.ca)). These databases were linked using encrypted patient-specific identifiers. Health care expenditures were calculated using ICES person-level health utilization costing algorithms(15). Costs were expressed in 2013 Canadian Dollars. More details on the study population and data sources were published as a study protocol elsewhere (16).

### Study population

Incident senior HCUs were defined as individuals aged 66 years or older with annual total healthcare expenditures within the top 5% threshold of all Ontarians in FY2013, who were not in the top 5% in FY2012 fiscal year. The 5% threshold is commonly used in HCU studies in Canada and elsewhere(3, 4, 11, 17). Non-HCUs were Ontarians in FY2013 with annual total health care expenditures in both FY2012 and FY2013 less than the top 5% threshold. The incident HCU cohort was matched with non-HCUs in a ratio of 1:3 according to age at cohort entry ( $\pm 1$  month), sex and Local Health Integration Network (LHIN) of patient residence. The  $>66$  year age threshold was applied to capture Ontario Drug Benefits (ODB) costs for at least one year before FY2013.

### Patient characteristics

The study population was characterized by socio-demographic (e.g., age, sex, income), health status (e.g., Johns Hopkins Aggregate Diagnosis Groups (ADG))(18), and health care variables (e.g. number of specialist visits) in the

1 baseline year. The variables were described in the study protocol(16) in greater detail and are briefly summarized  
2  
3  
4 in Appendix 1.

### 6 **Unplanned index hospitalization**

8  
9 Patients with an unplanned index hospitalization (IH) were defined as individuals who had not been hospitalized  
10  
11 for at least 12 months prior to their first acute inpatient hospitalization in FY2013. Unplanned IHs were defined as  
12  
13 non-elective admissions as recorded in the Canadian Institute for Health Information's (CIHI) Discharge Abstract  
14  
15 Database (DAD). The ICD10-CA diagnosis code most responsible for resource use (abbreviated as MRDx) was used  
16  
17 to define the reason for each hospitalization. The acute portion of each hospital length of stay (ALOS) was  
18  
19 summarized as the mean number of the days of hospitalization. Alternate level of care (ALC) status, which refers  
20  
21 to patients who no longer require acute care but who occupy a hospital bed while awaiting placement in another  
22  
23 healthcare facility(19), was expressed as the proportion of patients with ALC status. We also calculated the  
24  
25 proportion of patients who were admitted to a teaching facility and the proportion who resided in a LHIN different  
26  
27 than the hospital LHIN (Appendix 1). IH costs were calculated according to MRDx. Inpatient mortality was defined  
28  
29 as all-cause in-hospital mortality among the subset of patients who had an unplanned IH. In addition, we  
30  
31 calculated the number of days patients were in hospital before death.  
32  
33  
34  
35  
36

### 37 **Statistical analysis**

38  
39 We first compared the patient characteristics of the two cohorts in FY2012 by measuring absolute standardised  
40  
41 difference (aSD). The aSD of 0.1 and above indicated a meaningful difference(20). In the second step, the  
42  
43 attributes of the unplanned IHs among senior HCUs versus non-HCUs were described in terms of ALOS, ALC,  
44  
45 discharge disposition and death before discharge. Thirdly, the most common clinical causes of admission and their  
46  
47 associated costs were determined for both groups. The cumulative percentage of the total unplanned IH costs by  
48  
49 MRDx and average annual costs for each diagnosis were also computed.  
50  
51  
52  
53

54 We used logistic regression, one model for each cohort, to identify independent predictors of unplanned IHs.  
55  
56 Odds ratios and 95% confidence intervals were reported. The list of potential predictors consisted of socio-  
57  
58  
59  
60

1 demographic, health status and health care characteristics measured in FY2012, as described in Appendix 1. We  
2 included all relevant variables in the models regardless of their statistical significance. We assessed model  
3 discrimination using the c-statistic, where a c-statistic value of 0.70 and above indicates good discrimination (21).  
4  
5  
6  
7  
8 Additional information on the statistical methods including model cross-validation and predictive accuracy is  
9 provided in Appendix 2.  
10  
11  
12

## 13 **Results**

### 14 Baseline patient characteristics

15  
16  
17  
18  
19 The total study population consisted of 703,388 seniors, of which 175,847 were incident HCUs. The average age  
20 was 77.7 years and 53% of individuals in both cohorts were women and resided in suburban areas (Table 1).  
21  
22 Compared to non-HCUs, HCUs were sicker (number of ADGs: 10.2 vs. 7.9%, aSD=0.54), were dispensed a higher  
23 number of medications (8.4 vs 5.6, aSD=0.6), visited their primary care provider more often (95.6% vs. 84.3%,  
24 aSD=0.38), received more specialty care (89.8% vs. 74.2%; aSD=0.41) and home care services in the year preceding  
25 the index year. HCUs were more likely to have a primary care provider (primary care group: 97% vs. 88.6%,  
26 aSD=0.33). More than one third of the HCUs visited an emergency department compared to non-HCUs (31.8% vs.  
27 19.3%, aSD=0.29). The non-HCUs had a higher proportion of recent immigrants (4.3% vs. 2.4%; aSD=0.11). In terms  
28 of the other study characteristics, the study cohorts were otherwise similar.  
29  
30  
31  
32  
33  
34  
35  
36  
37  
38  
39

### 40 Characteristics of unplanned index hospitalization

41  
42  
43 Unplanned IHs accounted for 71% and 82% of index hospitalizations among HCUs and non-HCUs, respectively, in  
44 FY2013. More than half of the HCUs (N=95,308; 54.2%) had an unplanned IH compared to only 1.7% (N=8,835) of  
45 the non-HCUs (Table 2). Among those hospitalized, HCUs had a longer length of stay (mean ALOS, 7.5 vs 2.9 days;  
46 aSD=0.73), were designated ALC status in higher numbers (20.8% vs. 1.7%; aSD=64), and, once transferred to ALC,  
47 had a relatively greater number of ALC days (2.96 vs. 0.06 days; aSD=0.32). Compared with 1.3% of non-HCUs,  
48 23.0% of HCU patients were transferred to another acute care or LTC facility, while most non-HCU seniors (83.6%)  
49 were discharged home (with or without support). There was a striking difference in inpatient mortality between  
50  
51  
52  
53  
54  
55  
56  
57  
58  
59  
60

1 the cohorts: non-HCU patients were more than twice as likely to die in hospital compared to HCUs (14.0% vs.  
2 6.4%, aSD=0.25), despite the HCUs longer mean ALOS. Among those who died in hospital, non-HCUs also had a  
3 substantially shorter stay before death (2.3 vs. 17.9 days; aSD=1.92).  
4  
5  
6  
7

#### 8 Index hospitalization costs

9  
10  
11 Unplanned IHs accounted for 74% (HCU) and 81% (non-HCU) of the costs associated with all IH (unplanned plus  
12 elective) during the year of study. The average cost per patient associated with the unplanned IH was \$12,471 (SD  
13 \$19,935) for HCUs and \$3,749 (SD: \$1,290) for non HCU (Table 3). Ten conditions accounted for one third of the  
14 costs: 36.4% (HCU) and 35.3% (non-HCU). Acute myocardial infarction (8%) was the leading most costly reason of  
15 IH among HCUs, compared to pneumonia (6%) among non-HCUs. Five conditions (i.e., cerebral infarction,  
16 congestive heart failure (HF), pneumonia, chronic obstructive pulmonary disease (COPD), and ileus/intestinal  
17 obstruction) were among the top 10 most costly conditions in both cohorts. The costliest conditions were also the  
18 most frequent causes of unplanned hospitalizations in both cohorts.  
19  
20  
21  
22  
23  
24  
25  
26  
27  
28

#### 29 Predictors of unplanned IHs

30  
31  
32 Overall, the direction, magnitude and significance of odds ratios (OR) were similar across the two cohorts for many  
33 of the predictors of unplanned IH (Table 4). Predictors specific to the HCU cohort included having visited a  
34 geriatrician in the previous year and living at long-term care facilities. Both were associated with lower odds of IHs  
35 (ORs: 0.81, 95%CI 0.76-0.86 and 0.29, 95%CI 0.25-0.34, respectively). Recent immigrants had lower odds of IHs  
36 which was unique among senior non-HCUs (ORs: 0.72, 95% CI 0.62-0.84). Some predictors had an opposite but  
37 statistically significant impact on admissions across the cohorts. Most notably, HCUs who had a primary care  
38 provider were at a lower risk of admission whereas among non-HCUs, attachment to a provider was associated  
39 with an increase in IH.  
40  
41  
42  
43  
44  
45  
46  
47  
48  
49  
50

#### 51 **Interpretation**

52  
53  
54 Our study provides an analysis of high cost healthcare use amongst seniors in Ontario. By examining the first  
55 hospitalization among “new” cases of senior HCUs in comparison with age, sex and geographically-matched non-  
56  
57  
58  
59  
60





1 magnitude of association, the “other” category of home care services for HCUs had a non-negligible protective  
2 effect in IHs. Since this variable was constructed to include a combination of social services, respite care and case  
3 management, it was impossible to tease out the impact of each of these services alone. This lends itself to further  
4 investigation.  
5  
6  
7  
8  
9

10 It is difficult to compare our results with other studies due to methodological heterogeneity, including the lack of  
11 differentiation between the category of admission (unplanned vs. elective), inclusion of re-admissions, or the use  
12 of a different HCU threshold (e.g., top 1%). However, we found our results to be consistent with previous research  
13 in several aspects. First, our list of the most frequent and most costly MRDx is overall in line with prior limited  
14 studies on senior HCUs from Canada and elsewhere that examined the financial contribution of individual  
15 conditions: cardio-vascular, orthopedic, infectious diseases are predominant reasons of admissions(4, 36). Further,  
16 a number of models from different jurisdictions examined this risk among community-dwelling seniors(10). Similar  
17 to our results, older age, male sex, visits to the ED and prevalent chronic conditions were associated with higher  
18 odds of admission. Finally, our findings support earlier reports of the “healthy immigrant” effect(37): recent senior  
19 immigrants were less likely to become HCUs or be admitted with an IH.  
20  
21  
22  
23  
24  
25  
26  
27  
28  
29  
30  
31  
32  
33

34 Key strengths of this study include its population-based, matched design, and our examination of poorly studied  
35 aspects of the senior HCU population in the Canadian context. Our study also has limitations. The discriminatory  
36 power of the models was only fair, although the values of c-statistic were close to a number of previously reported  
37 risk prediction models in the general senior population(10). Running the models on more homogeneous  
38 subgroups of patients (e.g. COPD, HF) improved model discrimination (e.g. c-statistics above .7), especially for  
39 HCUs (Appendix 4), and these results were consistent with the main analyses. Further, some findings are based on  
40 variables with low prevalence: LTC residence status (n=835; 0.5%), geriatrician visits (n=4967; 2.8%), although this  
41 is relative to the very large size of the study population. The study focused only on unplanned IHs rather than  
42 including elective admissions. This limits the generalizability of our results to all hospitalizations, but unplanned  
43 admissions account for >70% in either cohort. Finally, our modeling is exploratory - the results suggest association  
44 but certainly not causation.  
45  
46  
47  
48  
49  
50  
51  
52  
53  
54  
55  
56  
57  
58  
59  
60

**Conclusions**

Unplanned IHs contribute to the conversion of seniors from non-HCU to HCU as suggested by the high prevalence of IH among HCUs and the corresponding costs driven partly by longer lengths of stay for acute hospital need and more ALC. Improved access to specialist outpatient care, home-based social care, and LTC when required, are worth further investigation.

Confidential

## References

1. Rais S, Nazerian A, Ardal S, Chechulin Y, Bains N, Malikov K. High-cost users of Ontario's healthcare services. *Healthcare policy = Politiques de sante*. 2013;9(1):44-51.
2. Wodchis WP. The Concentration of Health Care Spending: Little Ado (yet) About Much (money). Presented at the Canadian Association for Health Services and Policy Research (CASHPR) 2012 Conference. Available at: [https://www.cahspr.ca/web/uploads/presentations/C6.1\\_Walter\\_P.\\_Wodchis.pdf](https://www.cahspr.ca/web/uploads/presentations/C6.1_Walter_P._Wodchis.pdf). Accessed October 1, 2015.
3. Riley GF. Long-term trends in the concentration of Medicare spending. *Health affairs (Project Hope)*. 2007;26(3):808-16.
4. Wodchis WP, Austin PC, Henry DA. A 3-year study of high-cost users of health care. *Cmaj*. 2016;188(3):182-8.
5. Lee JY, Muratov S, Tarride JE, Holbrook AM. Managing High-Cost Healthcare Users: The International Search for Effective Evidence-Supported Strategies. *J Am Geriatr Soc*. 2018.
6. McCarthy D, Ryan J, Klein S. Models of Care for High-Need, High-Cost Patients: An Evidence Synthesis. 2015 [
7. Mondor L, Walker K, Bai YQ, Wodchis WP. Use of hospital-related health care among Health Links enrollees in the Central Ontario health region: a propensity-matched difference-in-differences study. *CMAJ open*. 2017;5(4):E753-E9.
8. Peikes D, Chen A, Schore J, Brown R. Effects of care coordination on hospitalization, quality of care, and health care expenditures among Medicare beneficiaries: 15 randomized trials. *Jama*. 2009;301(6):603-18.
9. Dattalo M, Nothelle S, Chapman EN. Targeting Enhanced Services Toward High-Cost, High-Need Medicare Patients. 2016:13-30.
10. Wallace E, Stuart E, Vaughan N, Bennett K, Fahey T, Smith SM. Risk prediction models to predict emergency hospital admission in community-dwelling adults: a systematic review. *Medical care*. 2014;52(8):751-65.
11. Holtz-Eakin D. High-Cost Medicare Beneficiaries 2005 [Available from: <http://www.cbo.gov/publication/16487>
12. Sinha SK. Why the elderly could bankrupt Canada and how demographic imperatives will force the redesign of acute care service delivery. *HealthcarePapers*. 2011;11(1):46-51; discussion 86-91.
13. Clough JD, Riley GF, Cohen M, Hanley SM, Sanghavi D, DeWalt DA, et al. Patterns of care for clinically distinct segments of high cost Medicare beneficiaries. *Healthcare (Amsterdam, Netherlands)*. 2016;4(3):160-5.
14. Wammes JGG, van der Wees PJ, Tanke MAC, Westert GP, Jeurissen PPT. Systematic review of high-cost patients' characteristics and healthcare utilisation. *BMJ Open*. 2018;8(9):e023113.
15. Wodchis WP, Bushmeneva K, Nikitovic M, McKillop I. Guidelines on Person-Level Costing Using Administrative Databases in Ontario. Toronto: Health System Performance Research Network; 2013.
16. Muratov S, Lee J, Holbrook A, Paterson JM, Guertin JR, Mbuagbaw L, et al. Senior high-cost healthcare users' resource utilization and outcomes: a protocol of a retrospective matched cohort study in Canada. *BMJ Open*. 2017;7(12):e018488.
17. Guilcher SJ, Bronskill SE, Guan J, Wodchis WP. Who Are the High-Cost Users? A Method for Person-Centred Attribution of Health Care Spending. *PLoS One*. 2016;11(3):e0149179.
18. The Johns Hopkins ACG® System Version 10.0 Technical Reference Guide. Department of Health Policy and Management, Johns Hopkins University, Bloomberg School of Public Health; 2014.
19. Sutherland JM, Crump RT. Alternative level of care: Canada's hospital beds, the evidence and options. *Healthcare policy = Politiques de sante*. 2013;9(1):26-34.
20. Mamdani M, Sykora K, Li P, Normand S-LT, Streiner DL, Austin PC, et al. Reader's guide to critical appraisal of cohort studies: 2. Assessing potential for confounding. *BMJ : British Medical Journal*. 2005;330(7497):960-2.
21. Hosmer DW, Lemeshow S. *Applied Logistic Regression (2nd Edition)*. New York, NY: John Wiley & Sons; 2000.
22. An SJ, Kim TJ, Yoon BW. Epidemiology, Risk Factors, and Clinical Features of Intracerebral Hemorrhage: An Update. *Journal of stroke*. 2017;19(1):3-10.

23. Del Gobbo LC, Kalantarian S, Imamura F, Lemaitre R, Siscovick DS, Psaty BM, et al. Contribution of Major Lifestyle Risk Factors for Incident Heart Failure in Older Adults: The Cardiovascular Health Study. *Jacc Heart Failure*. 2015;3(7):520-8.
24. Lim J-S, Kwon H-M. Risk of “silent stroke” in patients older than 60 years: risk assessment and clinical perspectives. *Clinical Interventions in Aging*. 2010;5:239-51.
25. Woolf AD, Åkesson K. Preventing fractures in elderly people. *BMJ : British Medical Journal*. 2003;327(7406):89-95.
26. Yusuf S, Hawken S, Ounpuu S, Dans T, Avezum A, Lanus F, et al. Effect of potentially modifiable risk factors associated with myocardial infarction in 52 countries (the INTERHEART study): case-control study. *Lancet (London, England)*. 2004;364(9438):937-52.
27. Sutherland JM, Crump RT. Exploring alternative level of care (ALC) and the role of funding policies: an evolving evidence base for Canada CHSRF Series of reports on cost drivers and health system efficiency: paper 8; Available at <https://www.cfhi-fcass.ca>; 2011.
28. Ronksley PE, Kobewka DM, McKay JA, Rothwell DM, Mulpuru S, Forster AJ. Clinical characteristics and preventable acute care spending among a high cost inpatient population. *BMC Health Serv Res*. 2016;16:165.
29. Palmer KS, Brown AD, Evans JM, Marani H, Russell KK, Martin D, et al. Standardising costs or standardising care? Qualitative evaluation of the implementation and impact of a hospital funding reform in Ontario, Canada. *Health Research Policy and Systems*. 2018;16(1):74.
30. Lavergne RM. Regional variation in Alternate Level of Care (ALC) service use in British Columbia hospitals: An opportunity for intervention? Institute for Health System Transformation & Sustainability; ; 2015.
31. Klingler C, in der Schmitzen J, Marckmann G. Does facilitated Advance Care Planning reduce the costs of care near the end of life? Systematic review and ethical considerations. *Palliative medicine*. 2016;30(5):423-33.
32. Fowler R, Hammer M. End-of-life care in Canada. *Clinical and investigative medicine Medecine clinique et experimentale*. 2013;36(3):E127-32.
33. Hay C, Pacey M, Bains N, Ardal S. Understanding the Unattached Population in Ontario: Evidence from the Primary Care Access Survey (PCAS). *Healthcare policy = Politiques de sante*. 2010;6(2):33-47.
34. Graverholt B, Riise T, Jamtvedt G, Ranhoff AH, Kruger K, Nortvedt MW. Acute hospital admissions among nursing home residents: a population-based observational study. *BMC Health Serv Res*. 2011;11:126.
35. Ronald LA, McGregor MJ, McGrail KM, Tate RB, Broemling AM. Hospitalization rates of nursing home residents and community-dwelling seniors in British Columbia. *Canadian journal on aging = La revue canadienne du vieillissement*. 2008;27(1):109-15.
36. Joynt KE, Gawande AA, Orav EJ, Jha AK. Contribution of preventable acute care spending to total spending for high-cost Medicare patients. *JAMA*. 2013;309(24):2572-8.
37. Vang ZM, Sigouin J, Flenon A, Gagnon A. Are immigrants healthier than native-born Canadians? A systematic review of the healthy immigrant effect in Canada. *Ethnicity & health*. 2017;22(3):209-41.

**Table 1: Characteristics of HCU Study Population in the Pre-incident Year**

| Characteristic                                                                                                                                      | HCU (N=175,847)                | Non-HCU (N=527,541) | aSD  |
|-----------------------------------------------------------------------------------------------------------------------------------------------------|--------------------------------|---------------------|------|
| <b>Socio-demographics</b>                                                                                                                           |                                |                     |      |
| Age, mean $\pm$ SD, yr                                                                                                                              | 77.66 $\pm$ 7.65               | 77.66 $\pm$ 7.65    | 0    |
| Sex, female                                                                                                                                         | 93,119 (53%)                   | 279,501 (53.0%)     | 0    |
| Rural Index of Ontario (RIO) score <sup>a</sup> , mean $\pm$ SD                                                                                     | 12.23 $\pm$ 18.20              | 11.81 $\pm$ 18.18   | 0.02 |
| Low income                                                                                                                                          | 31,843 (18.1%)                 | 92,566 (17.5%)      | 0.01 |
| Recent immigrant (<15 yr in Canada)                                                                                                                 | 4,210 (2.4%)                   | 22,577 (4.3%)       | 0.11 |
| <b>Health Status</b>                                                                                                                                |                                |                     |      |
| # Adjusted Diagnostic Groups, mean $\pm$ SD                                                                                                         | 10.22 $\pm$ 4.00               | 7.93 $\pm$ 4.47     | 0.54 |
| Hypertension <sup>b</sup>                                                                                                                           | 110,692 (63.0%)                | 282,867 (53.6%)     | 0.19 |
| Congestive Heart Failure <sup>c</sup>                                                                                                               | 25,195 (14.3%)                 | 36,877 (7.0%)       | 0.24 |
| Chronic Obstructive Disease Pulmonary <sup>c</sup>                                                                                                  | 48,738 (27.7%)                 | 96,513 (18.3%)      | 0.23 |
| Diabetes <sup>c</sup>                                                                                                                               | 62,014 (35.3%)                 | 138,794 (26.3%)     | 0.2  |
| Myocardial infarction <sup>c</sup>                                                                                                                  | 12,892 (7.3%)                  | 24,024 (4.6%)       | 0.12 |
| Rheumatoid Arthritis <sup>c</sup>                                                                                                                   | 5,607 (3.2%)                   | 9,334 (1.8%)        | 0.09 |
| Malignancy <sup>b</sup>                                                                                                                             | 56,855 (32.3%)                 | 123,932 (23.5%)     | 0.2  |
| Mental Health condition <sup>b</sup>                                                                                                                | 67,441 (38.4%)                 | 144,377 (27.4%)     | 0.24 |
| <b>Health Care utilization<sup>d</sup></b>                                                                                                          |                                |                     |      |
| Long-term care facility, #/yr (%/yr)                                                                                                                | 835 (0.5%)                     | 316 (0.1%)          | 0.08 |
| Primary care provider enrollment model, #/yr (%/yr)                                                                                                 |                                |                     |      |
| Fee for service                                                                                                                                     | 16,938 (9.6%)                  | 45,751 (8.7%)       | 0.03 |
| Capitation                                                                                                                                          | 48,703 (27.7%)                 | 133,915 (25.4%)     | 0.05 |
| Enhanced fee for service                                                                                                                            | 51,637 (29.4%)                 | 143,940 (27.3%)     | 0.05 |
| Family Health Team                                                                                                                                  | 51,159 (29.1%)                 | 137,516 (26.1%)     | 0.07 |
| None (no primary care provider identified)                                                                                                          | 5,187 (3.0%)                   | 60,170 (11.4%)      | 0.33 |
| Number of medications, mean $\pm$ SD                                                                                                                | 8.44 $\pm$ 4.96                | 5.61 $\pm$ 4.47     | 0.6  |
| Emergency department visits                                                                                                                         | #/yr (%/yr) 55,964 (31.8%)     | 101,896 (19.3%)     | 0.29 |
|                                                                                                                                                     | mean $\pm$ SD 0.56 $\pm$ 1.13  | 0.30 $\pm$ 0.80     | 0.26 |
| Visits to a general practitioner                                                                                                                    | #/yr (%/yr) 168,024 (95.6%)    | 444,614 (84.3%)     | 0.38 |
|                                                                                                                                                     | mean $\pm$ SD 8.03 $\pm$ 6.79  | 5.63 $\pm$ 5.58     | 0.39 |
| Visits to a specialist                                                                                                                              | #/yr (%/yr) 157,823 (89.8%)    | 391,557 (74.2%)     | 0.41 |
|                                                                                                                                                     | mean $\pm$ SD 7.40 $\pm$ 6.65  | 4.43 $\pm$ 5.13     | 0.5  |
| Visits to a geriatrician                                                                                                                            | 4,967 (2.8%)                   | 5,935 (1.1%)        | 0.12 |
| Homecare visits                                                                                                                                     |                                |                     |      |
| Nursing                                                                                                                                             | #/yr (%/yr) 7,218 (4.1%)       | 7,385 (1.4%)        | 0.17 |
|                                                                                                                                                     | mean $\pm$ SD 0.54 $\pm$ 4.03  | 0.16 $\pm$ 2.00     | 0.12 |
| Personal support (%/yr)                                                                                                                             | #/yr 13,789 (7.8%)             | 10,612 (2.0%)       | 0.27 |
|                                                                                                                                                     | mean $\pm$ SD 6.43 $\pm$ 30.57 | 1.46 $\pm$ 13.53    | 0.21 |
| Allied health                                                                                                                                       | #/yr (%/yr) 9,250 (5.3%)       | 7,982 (1.5%)        | 0.21 |
|                                                                                                                                                     | mean $\pm$ SD 0.18 $\pm$ 0.99  | 0.05 $\pm$ 0.52     | 0.17 |
| Other <sup>e</sup>                                                                                                                                  | #/yr (%/yr) 27,605 (15.7%)     | 25,965 (4.9%)       | 0.36 |
|                                                                                                                                                     | mean $\pm$ SD 0.58 $\pm$ 2.30  | 0.14 $\pm$ 0.96     | 0.25 |
| a- RIO score classification: urban= <10; suburban=10-39; rural $\geq$ 40                                                                            |                                |                     |      |
| b- constructed based on Expanded Diagnosis Codes; c- ICES-derived cohort; d- a mean of care utilization refers to the number per person per FY2012; |                                |                     |      |
| e - included a combination of social support, respite care, and case management;                                                                    |                                |                     |      |
| aSD- absolute standardized difference with aSD > 0.1 indicating meaningful difference between admitted and non-admitted; SD- standard deviation     |                                |                     |      |

**Table 2: Characteristics of unplanned index hospitalizations\***

| Characteristic                                                                                                                        | HCU               | Non-HCU         | aSD  |
|---------------------------------------------------------------------------------------------------------------------------------------|-------------------|-----------------|------|
| Number of individuals with an IH (% of total population)                                                                              | 133,821 (71%)     | 10770 (82%)     |      |
| Number of individuals with an unplanned IHS (% of total patient with IH)                                                              | 95,308 (54.2%)    | 8,835 (1.7%)    |      |
| Acute length of stay,<br>mean $\pm$ SD, days                                                                                          | 7.52 $\pm$ 8.71   | 2.91 $\pm$ 2.16 | 0.73 |
| Alternate level of care# (ALC)                                                                                                        | 19,849 (20.8%)    | 147 (1.7%)      | 0.64 |
| # days spent in ALC (for those with ALC designation), mean $\pm$ SD                                                                   | 2.96 $\pm$ 12.71  | 0.06 $\pm$ 0.72 | 0.32 |
| Discharge disposition                                                                                                                 |                   |                 |      |
| Inpatient hospital care                                                                                                               | 6,279 (6.6%)      | 47 (0.5%)       | 0.33 |
| Long term or continuing care facility                                                                                                 | 15,602 (16.4%)    | 70 (0.8%)       | 0.58 |
| Home with support§                                                                                                                    | 23,810 (25.0%)    | 1,097 (12.4%)   | 0.33 |
| Home                                                                                                                                  | 42,994 (45.1%)    | 6,293 (71.2%)   | 0.55 |
| Admission to a teaching care facility                                                                                                 | 25,597 (26.9%)    | 2,097 (23.7%)   | 0.07 |
| Admission to an out of health district acute care facility                                                                            | 10,390 (10.9%)    | 770 (8.7%)      | 0.07 |
| Death before discharge                                                                                                                | 6,112 (6.4%)      | 1,241 (14.0%)   | 0.25 |
| Number of days spent at the hospital before death outcome                                                                             | 17.86 $\pm$ 25.27 | 2.32 $\pm$ 1.85 | 0.87 |
| *.- defined as first admission in the incident year among those without hospitalization in the past 12 months                         |                   |                 |      |
| # - refers to seniors that no longer require acute care but occupy hospital beds waiting for placement in other healthcare facilities |                   |                 |      |
| §-support options include: senior's lodge, attendant care, home care, meals on wheels, homemaking, supportive housing, etc            |                   |                 |      |
| SD- standard deviation; aSD- absolute standardized difference with aSD > 0.1 indicating meaningful difference between women and men   |                   |                 |      |

**Table 3: Top 20 most expensive conditions, unplanned index hospitalization**

| HCU: n= 95,308                                                                                               |                                                                    |                  |           |              |                                     |  | Non-HCU: n= 8,835                                                                                              |                                            |                 |           |              |                                     |
|--------------------------------------------------------------------------------------------------------------|--------------------------------------------------------------------|------------------|-----------|--------------|-------------------------------------|--|----------------------------------------------------------------------------------------------------------------|--------------------------------------------|-----------------|-----------|--------------|-------------------------------------|
| Total 1-year inpatient cost associated with unplanned IHs: \$1,188,544,347 (74% of all HCU hospitalizations) |                                                                    |                  |           |              |                                     |  | Total 1-year inpatient costs associated with unplanned IHs: \$33,130,373 (81% of all non-HCU hospitalizations) |                                            |                 |           |              |                                     |
| Average costs per HCU (mean ± SD): 12,471 ± 19,935                                                           |                                                                    |                  |           |              |                                     |  | Average costs per non-HCU (mean ± SD): 3,749 ± 1,290                                                           |                                            |                 |           |              |                                     |
| ICD10 code                                                                                                   | Condition                                                          | Inpatient costs  | Frequency | Average cost | Cumulative to total unplanned costs |  | ICD10 code                                                                                                     | Condition                                  | Inpatient costs | Frequency | Average cost | Cumulative to total unplanned costs |
| I21                                                                                                          | Acute myocardial infarction                                        | \$ 92,924,331.27 | 6045      | \$ 15,372.10 | 7.8%                                |  | J18                                                                                                            | Pneumonia                                  | \$ 1,970,228.65 | 439       | \$ 4,487.99  | 6%                                  |
| S72                                                                                                          | Fracture of femur                                                  | \$ 84,898,511.82 | 5181      | \$ 16,386.51 | 15.0%                               |  | J44                                                                                                            | Chronic obstructive pulmonary disease      | \$ 1,448,358.06 | 304       | \$ 4,764.34  | 10.3%                               |
| I63                                                                                                          | Cerebral infarction                                                | \$ 54,321,115.26 | 3912      | \$ 13,885.77 | 19.5%                               |  | R55                                                                                                            | Syncope and collapse                       | \$ 1,337,333.96 | 432       | \$ 3,095.68  | 14.4%                               |
| I50                                                                                                          | Heart failure                                                      | \$ 41,778,511.43 | 4069      | \$ 10,267.51 | 23.0%                               |  | I48                                                                                                            | Atrial fibrillation and flutter            | \$ 1,120,050.76 | 316       | \$ 3,544.46  | 17.7%                               |
| J44                                                                                                          | Other chronic obstructive pulmonary disease                        | \$ 37,347,675.22 | 4184      | \$ 8,926.31  | 26.2%                               |  | N39                                                                                                            | Disorders of urinary system                | \$ 1,115,864.19 | 267       | \$ 4,179.27  | 21.1%                               |
| A41                                                                                                          | Other septicemia                                                   | \$ 31,204,568.40 | 1487      | \$ 20,984.91 | 28.8%                               |  | I50                                                                                                            | Heart failure                              | \$ 1,114,152.33 | 235       | \$ 4,741.07  | 24.5%                               |
| J18                                                                                                          | Pneumonia, organism unspecified                                    | \$ 25,734,867.64 | 2811      | \$ 9,155.06  | 31.0%                               |  | R07                                                                                                            | Pain in throat and chest                   | \$ 1,040,653.40 | 373       | \$ 2,789.96  | 27.6%                               |
| I25                                                                                                          | Chronic ischaemic heart disease                                    | \$ 25,625,722.16 | 1352      | \$ 18,953.94 | 33.1%                               |  | K56                                                                                                            | Paralytic ileus and intestinal obstruction | \$ 887,672.60   | 266       | \$ 3,337.12  | 30.3%                               |
| F05                                                                                                          | Delirium, not induced by alcohol and other psychoactive substances | \$ 20,132,341.32 | 1305      | \$ 15,427.08 | 34.8%                               |  | I63                                                                                                            | Cerebral infarction                        | \$ 834,442.33   | 153       | \$ 5,453.87  | 32.8%                               |
| K56                                                                                                          | Paralytic ileus and intestinal obstruction without hernia          | \$ 19,169,068.91 | 1501      | \$ 12,770.87 | 36.4%                               |  | Z51                                                                                                            | Other medical care                         | \$ 818,227.58   | 266       | \$ 3,076.04  | 35.3%                               |
| 64 ICD10codes account for 75% of the total unplanned IH costs                                                |                                                                    |                  |           |              |                                     |  | 53 ICD10codes account for 75% of the total unplanned IH costs                                                  |                                            |                 |           |              |                                     |
| 852 ICD10codes account for 100% of the total unplanned IH costs                                              |                                                                    |                  |           |              |                                     |  | 435 ICD10codes account for 100% of the total unplanned IH costs                                                |                                            |                 |           |              |                                     |



**Table 4 Predictors of unplanned index hospitalization**

| Covariates                                          |                              | HCUs             | P value | Non-HCUs         | P value |
|-----------------------------------------------------|------------------------------|------------------|---------|------------------|---------|
|                                                     |                              | OR (95% CI)      |         | OR (95% CI)      |         |
| <b>Age:</b>                                         |                              |                  |         |                  |         |
|                                                     | 75-84y vs. 66-74y            | 1.33 (1.29-1.37) | <.0001  | 1.5 (1.42-1.58)  | <.0001  |
|                                                     | >=85y vs. 66-74y             | 1.66 (1.6-1.71)  | <.0001  | 2.53 (2.39-2.69) | <.0001  |
| <b>Sex (M)</b>                                      |                              | 1.03 (1.01-1.06) | 0.0081  | 1.06 (1.01-1.1)  | 0.0167  |
| <b>Low income status</b>                            |                              | 1.04 (1.01-1.08) | 0.013   | 1.06 (1-1.12)    | 0.0359  |
| <b>Rurality Index for Ontario, score</b>            |                              | 1 (1-1)          | 0.7553  | 1.01 (1.01-1.01) | <.0001  |
| <b>Immigrant status</b>                             |                              | 0.98 (0.9-1.05)  | 0.5213  | 0.72 (0.62-0.84) | <.0001  |
| <b>Malignancy</b>                                   |                              | 0.81 (0.79-0.83) | <.0001  | 1 (0.95-1.05)    | 0.9556  |
| <b>Hypertension</b>                                 |                              | 1.09 (1.06-1.12) | <.0001  | 1.08 (1.03-1.13) | 0.0015  |
| <b>Congestive heart failure (CHF)</b>               |                              | 1.36 (1.32-1.41) | <.0001  | 1.47 (1.37-1.57) | <.0001  |
| <b>History of myocardial infarction</b>             |                              | 1.21 (1.16-1.27) | <.0001  | 1.43 (1.32-1.55) | <.0001  |
| <b>Chronic Obstructive Pulmonary Disease (COPD)</b> |                              | 1.26 (1.22-1.29) | <.0001  | 1.27 (1.21-1.34) | <.0001  |
| <b>Diabetes</b>                                     |                              | 0.93 (0.91-0.96) | <.0001  | 0.95 (0.9-1)     | 0.0485  |
| <b>Rheumatoid arthritis</b>                         |                              | 1.09 (1.02-1.16) | 0.0111  | 1.08 (0.93-1.25) | 0.3401  |
| <b>Mental health condition</b>                      |                              | 0.98 (0.96-1.01) | 0.113   | 1.09 (1.04-1.14) | 0.0004  |
| <b>LTC residence</b>                                |                              | 0.29 (0.25-0.34) | <.0001  | 1.13 (0.58-2.21) | 0.7235  |
| <b>Primary care enrollment</b>                      |                              |                  |         |                  |         |
|                                                     | FFS vs. no provider          | 0.83 (0.77-0.91) | <.0001  | 3.64 (3.18-4.17) | <.0001  |
|                                                     | Capitation vs. no provider   | 0.75 (0.7-0.82)  | <.0001  | 3.14 (2.77-3.55) | <.0001  |
|                                                     | Enhanced FFS vs. no provider | 0.78 (0.72-0.84) | <.0001  | 2.99 (2.64-3.39) | <.0001  |
|                                                     | FHT vs. no provider          | 0.79 (0.73-0.85) | <.0001  | 3.65 (3.23-4.13) | <.0001  |
| <b>Prescription drugs</b>                           |                              | 0.99 (0.98-0.99) | <.0001  | 1.01 (1.01-1.02) | 0.0001  |
| <b>Emergency department visits</b>                  |                              | 1.06 (1.05-1.08) | <.0001  | 1.16 (1.14-1.18) | <.0001  |
| <b>Visits to general practitioner</b>               |                              | 1 (0.99-1)       | <.0001  | 1 (0.99-1)       | 0.2336  |
| <b>Visits to specialist</b>                         |                              | 0.95 (0.95-0.95) | <.0001  | 0.99 (0.99-1)    | 0.0035  |
| <b>Visit to a geriatrician</b>                      |                              | 0.81 (0.76-0.86) | <.0001  | 1.06 (0.89-1.26) | 0.5223  |
| <b>Homecare visits</b>                              |                              |                  |         |                  |         |
|                                                     | nursing                      | 0.99 (0.99-1)    | <.0001  | 1.01 (1-1.01)    | 0.1919  |
|                                                     | personal support             | 1 (1-1)          | <.0001  | 1 (0.99-1)       | <.0001  |
|                                                     | allied health                | 1.01 (1-1.02)    | 0.2753  | 1.01 (0.98-1.05) | 0.4088  |
|                                                     | other                        | 0.94 (0.93-0.94) | <.0001  | 1.02 (1.01-1.04) | 0.0007  |
| <b>C-statistics</b>                                 |                              | 0.65             |         | 0.67             |         |
| <b>C-statistics (cross-validated)</b>               |                              | 0.65             |         | 0.67             |         |

Note: See Appendix 5 for detail on predictive accuracy

COPD- Chronic Obstructive Pulmonary Disease (COPD)

CHF- Congestive heart failure (CHF)

FFS- fee for service

LTC- long-term care

1  
2  
3  
4  
5  
6  
7  
8  
9  
10  
11  
12  
13  
14  
15  
16  
17  
18  
19  
20  
21  
22  
23  
24  
25  
26  
27  
28  
29  
30  
31  
32  
33  
34  
35  
36  
37  
38  
39  
40  
41  
42  
43  
44  
45  
46  
47

**Appendix 1 Description of key variables**

| Key variables                                                                                                                                  | Description                                                                                                                                                                                                                                                                                                                                       |
|------------------------------------------------------------------------------------------------------------------------------------------------|---------------------------------------------------------------------------------------------------------------------------------------------------------------------------------------------------------------------------------------------------------------------------------------------------------------------------------------------------|
| <b>Demographics (baseline year, FY2012)</b>                                                                                                    |                                                                                                                                                                                                                                                                                                                                                   |
| Age                                                                                                                                            | Age in years                                                                                                                                                                                                                                                                                                                                      |
| Sex                                                                                                                                            | Sex; female=0, male=1                                                                                                                                                                                                                                                                                                                             |
| Rio2008                                                                                                                                        | Rurality Index for Ontario; on a scale of 0 to 100 with 100 being most rural                                                                                                                                                                                                                                                                      |
| Lowinc                                                                                                                                         | Subjects with low income status were identified based upon net household income reported to receive public drug benefit subsidy in FY2012 which relies on actual net income. For a small proportion of HCU (3%) and non-HCU (13%) who did not fill a prescription in FY2012, low-income status was defined as census neighborhood income quintile |
| Recent_immigration                                                                                                                             | Whether immigrated in 15 years prior to FY2012 (based on landing records for permanent legal immigrants in Ontario)                                                                                                                                                                                                                               |
| <b>Health status/comorbidity (baseline year, FY2012)</b>                                                                                       |                                                                                                                                                                                                                                                                                                                                                   |
| # of ADGs                                                                                                                                      | Aggregated Diagnosis Groups (ADGs) are derived from Johns Hopkins Adjusted Clinical Groups (ACGs, the Johns Hopkins ACG® System Version 10): a person-focused, diagnosis-based way to measure patients' illness                                                                                                                                   |
| Hypertension, Malignancy, Mental health condition                                                                                              | For each condition, whether the patient was diagnosed with the condition in the past 3 years prior to FY2013; computed using John Hopkins Expanded Diagnosis Clusters (EDCs)                                                                                                                                                                      |
| Congestive heart failure (CHF), History of myocardial infarction, Chronic Obstructive Pulmonary Disease (COPD), Diabetes, Rheumatoid arthritis | Whether the patient is listed in a corresponding ICES-derived cohort for each condition                                                                                                                                                                                                                                                           |
| <b>Healthcare characteristics (baseline year, FY2012)</b>                                                                                      |                                                                                                                                                                                                                                                                                                                                                   |
| # of drugnames                                                                                                                                 | Number of prescription drugs the patient was dispensed                                                                                                                                                                                                                                                                                            |
| # of physician visits                                                                                                                          | Number of physician visits; reported by categories (family practitioner and specialist)                                                                                                                                                                                                                                                           |
| # of home care visits                                                                                                                          | Number of home care visits; reported as total and by categories (nursing, personal support, allied health and other)                                                                                                                                                                                                                              |
| Geriatrician                                                                                                                                   | Whether visited a geriatrician                                                                                                                                                                                                                                                                                                                    |
| Primarycare group                                                                                                                              | Primary care payment models: Fee for Service (FFS), Enhanced FFS, Family Health Team (FHT), Capitation, and None                                                                                                                                                                                                                                  |
| Long-term care (LTC)                                                                                                                           | Whether was placed in a LTC facility                                                                                                                                                                                                                                                                                                              |
| <b>Features of Index hospitalizations (incident year, FY2013)</b>                                                                              |                                                                                                                                                                                                                                                                                                                                                   |
| LOS                                                                                                                                            | Length of stay, days                                                                                                                                                                                                                                                                                                                              |
| instftyp_                                                                                                                                      | Institution from where admitted                                                                                                                                                                                                                                                                                                                   |
| instlhin_                                                                                                                                      | LHIN where admitted                                                                                                                                                                                                                                                                                                                               |
| dx10code1-25                                                                                                                                   | Diagnosis ICD10 codes for each admission                                                                                                                                                                                                                                                                                                          |
| dischdisp                                                                                                                                      | Institution where discharged to                                                                                                                                                                                                                                                                                                                   |
| inpatient_costs_                                                                                                                               | Inpatient hospitalization Costs                                                                                                                                                                                                                                                                                                                   |

## Appendix 2: Supplemental statistical and sensitivity analysis section

Model discrimination (predictive accuracy) was assessed by the area under the receiver operating characteristic curve (AUROC) represented by the c-statistic. We used a threshold of a c-statistic value of 0.70 and above indicates good discrimination between those admitted versus not admitted(1). We evaluated the model's ability to predict subgroups of patients with a differing risk of index hospitalization by plotting predicted vs. observed events in deciles(2, 3). Each model was validated through cross-validation (4). As a sensitivity analysis and to check for collinearity, we also re-ran each multivariable model using the forward stepwise procedure with p-value <0.1 set as the inclusion criterion and p-value >0.05 as the removal threshold. We then compared the final selection of variables, the sign and magnitude of the odds ratios (OR) as well as their standard errors (SE): no discrepancy with the original results provided further evidence of a good fit and no/low collinearity. Analyses were conducted using SAS software version 9.4 (SAS Institute Inc., Cary, NC, USA).

Since dying in hospital could represent primarily the palliative or terminally ill senior with advanced directives requesting comfort interventions only(5), we carried out a sensitivity analysis excluding those who were admitted urgently but died before discharge.

### Results

The results of the stepwise approach were closely aligned with the original models (data available from the authors on request). Re-running the models on a dataset with deceased patients removed did not reveal notable deviations in the coefficients from the original models (Appendix 3). We also re-ran the models individually on 5 most costly conditions in both cohorts: the predictor estimates remained unaffected while c-statistics improved to above 0.7, especially among HCUs (Appendix 4).

1. Hosmer DW, Lemeshow S. Applied Logistic Regression (2nd Edition). New York, NY: John Wiley & Sons; 2000.
2. Kramer AA, Zimmerman JE. Assessing the calibration of mortality benchmarks in critical care: The Hosmer-Lemeshow test revisited. Critical care medicine. 2007;35(9):2052-6.
3. Pocock SJ, Wang D, Pfeffer MA, Yusuf S, McMurray JJ, Swedberg KB, et al. Predictors of mortality and morbidity in patients with chronic heart failure. European heart journal. 2006;27(1):65-75.
4. ROC analysis using validation data and cross validation. SAS Support. © SAS Institute Inc. [Available from: <http://support.sas.com/kb/39/724.html>].
5. Clark D, Armstrong M, Allan A, Graham F, Carnon A, Isles C. Imminence of death among hospital inpatients: Prevalent cohort study. Palliative medicine. 2014;28(6):474-9.

Confidential

### Appendix 3: Predictors of unplanned index hospitalization (deceased excluded)

| Covariates                                          |                              | HCUs             | P value | Non-HCUs         | P value |
|-----------------------------------------------------|------------------------------|------------------|---------|------------------|---------|
|                                                     |                              | OR (95% CI)      |         | OR (95% CI)      |         |
| <b>Age:</b>                                         |                              |                  |         |                  |         |
|                                                     | 75-84y vs. 66-74y            | 1.31 (1.28-1.35) | <.0001  | 1.42 (1.34-1.5)  | <.0001  |
|                                                     | >=85y vs. 66-74y             | 1.6 (1.54-1.65)  | <.0002  | 2.14 (2-2.28)    | <.0002  |
| <b>Sex (M)</b>                                      |                              | 1.02 (0.99-1.04) | <.0003  | 1.03 (0.98-1.08) | <.0003  |
| <b>Low income status</b>                            |                              | 1.03 (1-1.07)    | <.0004  | 1.03 (0.97-1.1)  | <.0004  |
| <b>Rurality Index for Ontario, score</b>            |                              | 1 (1-1)          | <.0005  | 1.01 (1.01-1.01) | <.0005  |
| <b>Immigrant status</b>                             |                              | 0.97 (0.9-1.05)  | <.0006  | 0.77 (0.66-0.9)  | <.0006  |
| <b>Malignancy</b>                                   |                              | 0.81 (0.79-0.83) | <.0007  | 0.98 (0.92-1.03) | <.0007  |
| <b>Hypertension</b>                                 |                              | 1.1 (1.07-1.13)  | <.0008  | 1.11 (1.06-1.17) | <.0008  |
| <b>Congestive heart failure (CHF)</b>               |                              | 1.33 (1.29-1.38) | <.0009  | 1.28 (1.19-1.38) | <.0009  |
| <b>History of myocardial infarction</b>             |                              | 1.21 (1.16-1.27) | <.0010  | 1.45 (1.33-1.59) | <.0010  |
| <b>Chronic Obstructive Pulmonary Disease (COPD)</b> |                              | 1.24 (1.2-1.27)  | <.0011  | 1.24 (1.17-1.31) | <.0011  |
| <b>Diabetes</b>                                     |                              | 0.94 (0.91-0.96) | <.0012  | 0.94 (0.89-0.99) | <.0012  |
| <b>Rheumatoid arthritis</b>                         |                              | 1.09 (1.02-1.16) | <.0013  | 1.06 (0.91-1.25) | <.0013  |
| <b>Mental health condition</b>                      |                              | 0.99 (0.96-1.01) | <.0014  | 1.08 (1.03-1.14) | <.0014  |
| <b>LTC residence</b>                                |                              | 0.29 (0.25-0.34) | <.0015  | 0.69 (0.26-1.86) | <.0015  |
| <b>Primary care enrollment</b>                      |                              |                  |         |                  |         |
|                                                     | FFS vs. no provider          | 0.85 (0.78-0.93) | <.0016  | 3.64 (3.14-4.22) | <.0016  |
|                                                     | Capitation vs. no provider   | 0.77 (0.71-0.84) | <.0017  | 3.08 (2.69-3.53) | <.0017  |
|                                                     | Enhanced FFS vs. no provider | 0.8 (0.74-0.86)  | <.0018  | 2.98 (2.6-3.42)  | <.0018  |
|                                                     | FHT vs. no provider          | 0.81 (0.74-0.87) | <.0019  | 3.69 (3.23-4.22) | <.0019  |
| <b>Prescription drugs</b>                           |                              | 0.99 (0.98-0.99) | <.0020  | 1.01 (1-1.02)    | <.0020  |
| <b>Emergency department visits</b>                  |                              | 1.07 (1.06-1.08) | <.0021  | 1.17 (1.15-1.2)  | <.0021  |
| <b>Visits to general practitioner</b>               |                              | 1 (0.99-1)       | <.0022  | 1 (0.99-1)       | <.0022  |
| <b>Visits to specialist</b>                         |                              | 0.95 (0.95-0.95) | <.0023  | 1 (0.99-1)       | <.0023  |
| <b>Visit to a geriatrician</b>                      |                              | 0.8 (0.75-0.85)  | <.0024  | 0.96 (0.78-1.17) | <.0024  |
| <b>Homecare visits</b>                              |                              |                  |         |                  |         |
|                                                     | nursing                      | 0.99 (0.99-1)    | <.0025  | 1 (0.99-1.01)    | <.0025  |
|                                                     | personal support             | 1 (1-1)          | <.0026  | 0.99 (0.99-0.99) | <.0026  |
|                                                     | allied health                | 1 (0.99-1.01)    | <.0027  | 0.98 (0.94-1.03) | <.0027  |
|                                                     | other                        | 0.93 (0.93-0.94) | <.0028  | 1.01 (1-1.03)    | <.0028  |
| <b>C-statistics</b>                                 |                              | 0.65             |         | 0.66             |         |
| <b>C-statistics (cross-validated)</b>               |                              | 0.65             |         | 0.66             |         |

COPD- Chronic Obstructive Pulmonary Disease (COPD)

CHF- Congestive heart failure (CHF)

FFS- fee for service

1  
2  
3  
4  
5  
6  
7  
8  
9  
10  
11  
12  
13  
14  
15  
16  
17  
18  
19  
20  
21  
22  
23  
24  
25  
26  
27  
28  
29  
30  
31  
32  
33  
34  
35  
36  
37  
38  
39  
40  
41  
42  
43  
44  
45  
46  
47

**Appendix 4: Predictors of unplanned index hospitalization for top most expensive 5 conditions among senior HCUs**

| Covariates                                                                                                                                            | AIM<br>OR (95% CI) | P value | Fracture<br>OR (95% CI) | P value | Cerebral infarction<br>OR (95% CI) | P value | CHF<br>OR (95% CI) | P value | COPD<br>OR (95% CI) | P value |
|-------------------------------------------------------------------------------------------------------------------------------------------------------|--------------------|---------|-------------------------|---------|------------------------------------|---------|--------------------|---------|---------------------|---------|
| <b>Age:</b>                                                                                                                                           |                    |         |                         |         |                                    |         |                    |         |                     |         |
| 75-84y vs. 66-74y                                                                                                                                     | 1.05 (0.99-1.12)   | 0.7996  | 2.3 (2.11-2.49)         | <.0001  | 1.56 (1.44-1.7)                    | 0.0006  | 1.78 (1.62-1.94)   | 0.6417  | 1.14 (1.06-1.24)    | 0.0032  |
| >=85y vs. 66-74y                                                                                                                                      | 1.12 (1.03-1.22)   | 0.0188  | 4.06 (3.72-4.44)        | <.0001  | 1.92 (1.75-2.12)                   | <.0001  | 3.05 (2.76-3.37)   | <.0001  | 1.05 (0.95-1.17)    | 0.7335  |
| <b>Sex (M)</b>                                                                                                                                        | 1.53 (1.45-1.63)   | <.0001  | 0.46 (0.43-0.5)         | <.0001  | 1.13 (1.05-1.21)                   | 0.001   | 1.06 (0.99-1.14)   | 0.0919  | 1.11 (1.03-1.19)    | 0.0071  |
| <b>Low income status</b>                                                                                                                              | 1.07 (0.99-1.15)   | 0.1084  | 0.94 (0.87-1.02)        | 0.1232  | 1.09 (1-1.2)                       | 0.0471  | 1.13 (1.04-1.23)   | 0.0056  | 0.98 (0.9-1.07)     | 0.6319  |
| <b>Rurality Index for Ontario, score</b>                                                                                                              | 1 (1-1.01)         | <.0001  | 1 (1-1)                 | 0.0004  | 0.99 (0.99-0.99)                   | <.0001  | 1 (1-1)            | 0.0129  | 1 (1-1)             | 0.1301  |
| <b>Immigrant status</b>                                                                                                                               | 1.05 (0.88-1.25)   | 0.6063  | 0.96 (0.77-1.19)        | 0.7184  | 1.09 (0.89-1.33)                   | 0.4023  | 0.92 (0.73-1.17)   | 0.5191  | 0.97 (0.74-1.28)    | 0.8338  |
| <b>Malignancy</b>                                                                                                                                     | 0.68 (0.63-0.72)   | <.0001  | 0.83 (0.77-0.89)        | <.0001  | 0.68 (0.62-0.73)                   | <.0001  | 0.74 (0.68-0.8)    | <.0001  | 0.76 (0.7-0.82)     | <.0001  |
| <b>Hypertension</b>                                                                                                                                   | 1.15 (1.08-1.22)   | <.0001  | 1.03 (0.96-1.1)         | 0.4391  | 1.34 (1.24-1.44)                   | <.0001  | 1.19 (1.1-1.28)    | <.0001  | 0.87 (0.81-0.94)    | 0.0002  |
| <b>Congestive heart failure (CHF)</b>                                                                                                                 | 1.16 (1.06-1.26)   | 0.0011  | 1.02 (0.93-1.12)        | 0.7105  | 1.29 (1.16-1.42)                   | <.0001  | 5.16 (4.78-5.56)   | <.0001  | 1.48 (1.36-1.62)    | <.0001  |
| <b>History of myocardial infarction</b>                                                                                                               | 2.33 (2.13-2.55)   | <.0001  | 1.18 (1.04-1.35)        | 0.0101  | 1.39 (1.23-1.58)                   | <.0001  | 1.45 (1.31-1.61)   | <.0001  | 1.04 (0.92-1.18)    | 0.5676  |
| <b>Chronic Obstructive Pulmonary Disease (COPD)</b>                                                                                                   | 1.03 (0.96-1.1)    | 0.4529  | 1.16 (1.08-1.24)        | <.0001  | 1 (0.92-1.09)                      | 0.9637  | 1.07 (0.99-1.16)   | 0.0762  | 14.03 (12.8-15.37)  | <.0001  |
| <b>Diabetes</b>                                                                                                                                       | 1 (0.94-1.07)      | 0.9908  | 0.79 (0.74-0.85)        | <.0001  | 0.99 (0.91-1.07)                   | 0.7299  | 1.26 (1.17-1.35)   | <.0001  | 0.6 (0.55-0.65)     | <.0001  |
| <b>Rheumatoid arthritis</b>                                                                                                                           | 1.04 (0.87-1.24)   | 0.6965  | 1.56 (1.33-1.83)        | <.0001  | 1.01 (0.82-1.26)                   | 0.8981  | 1.04 (0.85-1.28)   | 0.7109  | 1.04 (0.86-1.26)    | 0.6953  |
| <b>Mental health condition</b>                                                                                                                        | 0.86 (0.81-0.92)   | <.0001  | 1.03 (0.96-1.1)         | 0.4202  | 0.92 (0.85-0.99)                   | 0.0209  | 0.84 (0.78-0.9)    | <.0001  | 0.95 (0.88-1.02)    | 0.1581  |
| <b>LTC residence</b>                                                                                                                                  | 0.15 (0.06-0.38)   | <.0001  | 0.4 (0.28-0.59)         | <.0001  | 0.27 (0.13-0.56)                   | 0.0004  | 0.29 (0.16-0.53)   | <.0001  | 0.23 (0.11-0.48)    | <.0001  |
| <b>Primary care enrollment</b>                                                                                                                        |                    |         |                         |         |                                    |         |                    |         |                     |         |
| Capitation vs. FFS                                                                                                                                    | 0.91 (0.82-1.01)   | 0.0526  | 0.84 (0.76-0.94)        | 0.0128  | 0.85 (0.75-0.96)                   | 0.0005  | 0.81 (0.71-0.91)   | 0.0019  | 1.08 (0.94-1.24)    | 0.0606  |
| Enhanced FFS vs. FFS                                                                                                                                  | 0.93 (0.83-1.03)   | 0.1639  | 0.82 (0.73-0.92)        | 0.002   | 0.84 (0.75-0.95)                   | 0.0004  | 0.81 (0.71-0.91)   | 0.0028  | 1.06 (0.92-1.21)    | 0.0222  |
| Family health team vs. FFS                                                                                                                            | 0.89 (0.8-0.99)    | 0.0098  | 0.88 (0.78-0.98)        | 0.1244  | 0.85 (0.75-0.96)                   | 0.0006  | 0.9 (0.8-1.02)     | 0.5013  | 1.08 (0.94-1.24)    | 0.0659  |
| No provider identified vs. FFS                                                                                                                        | 1.06 (0.89-1.27)   | 0.2201  | 1.14 (0.94-1.39)        | 0.0068  | 1.5 (1.23-1.83)                    | <.0001  | 1.46 (1.16-1.84)   | <.0001  | 1.4 (1.09-1.81)     | 0.0687  |
| <b>Prescription drugs</b>                                                                                                                             | 0.97 (0.96-0.97)   | <.0001  | 0.95 (0.94-0.96)        | <.0001  | 0.94 (0.93-0.95)                   | <.0001  | 1.01 (1-1.01)      | 0.2352  | 1.05 (1.05-1.06)    | <.0001  |
| <b>Emergency department visits</b>                                                                                                                    | 1.05 (1.02-1.08)   | 0.0008  | 1.02 (0.99-1.05)        | 0.2613  | 1.01 (0.97-1.05)                   | 0.571   | 0.99 (0.95-1.02)   | 0.3894  | 1.07 (1.04-1.1)     | <.0001  |
| <b>Visits to general practitioner</b>                                                                                                                 | 0.99 (0.98-0.99)   | <.0001  | 1 (0.99-1.01)           | 0.8979  | 1 (0.99-1)                         | 0.1243  | 1 (0.99-1)         | 0.7077  | 0.98 (0.97-0.98)    | <.0001  |
| <b>Visits to specialist</b>                                                                                                                           | 0.92 (0.91-0.93)   | <.0001  | 0.93 (0.92-0.93)        | <.0001  | 0.93 (0.93-0.94)                   | <.0001  | 0.95 (0.95-0.96)   | <.0001  | 0.94 (0.93-0.95)    | <.0001  |
| <b>Visit to a geriatrician</b>                                                                                                                        | 0.60 (0.48-0.75)   | <.0001  | 0.89 (0.76-1.05)        | 0.1561  | 0.75 (0.6-0.93)                    | 0.0084  | 0.61 (0.49-0.75)   | <.0001  | 0.63 (0.49-0.81)    | 0.0002  |
| <b>Homecare visits</b>                                                                                                                                |                    |         |                         |         |                                    |         |                    |         |                     |         |
| nursing                                                                                                                                               | 0.99 (0.98-1)      | 0.0035  | 0.99 (0.98-1)           | 0.0041  | 0.99 (0.98-1)                      | 0.0096  | 0.99 (0.99-1)      | 0.0756  | 0.99 (0.99-1)       | 0.1523  |
| personal support                                                                                                                                      | 0.99 (0.99-1)      | <.0001  | 0.99 (0.99-1)           | <.0001  | 1 (0.99-1)                         | <.0001  | 0.99 (0.99-1)      | <.0001  | 1 (0.99-1)          | <.0001  |
| allied health                                                                                                                                         | 0.96 (0.92-1)      | 0.0522  | 0.99 (0.96-1.02)        | 0.6209  | 0.97 (0.93-1.02)                   | 0.2188  | 1 (0.97-1.04)      | 0.9914  | 1 (0.96-1.04)       | 0.9425  |
| social                                                                                                                                                | 0.82 (0.79-0.84)   | <.0001  | 0.92 (0.91-0.94)        | <.0001  | 0.85 (0.83-0.88)                   | <.0001  | 0.92 (0.9-0.94)    | <.0001  | 0.91 (0.89-0.93)    | <.0001  |
| <b>C-statistics</b>                                                                                                                                   | 0.73               |         | 0.75                    |         | 0.71                               |         | 0.78               |         | 0.85                |         |
| <b>C-statistics (cross-validated)</b>                                                                                                                 | 0.73               |         | 0.75                    |         | 0.71                               |         | 0.78               |         | 0.85                |         |
| AIM- Acute myocardial infarction<br>COPD- Chronic Obstructive Pulmonary Disease (COPD)<br>CHF- Congestive heart failure (CHF)<br>FFS- fee for service |                    |         |                         |         |                                    |         |                    |         |                     |         |

## Appendix 5: Predictive accuracy of the models

The models were able to predict the number of events (i.e., IHs) for subgroups of patients with a high degree of accuracy according to the plots below. This supports a good fit of the models.

### A. Index hospitalization – HCU

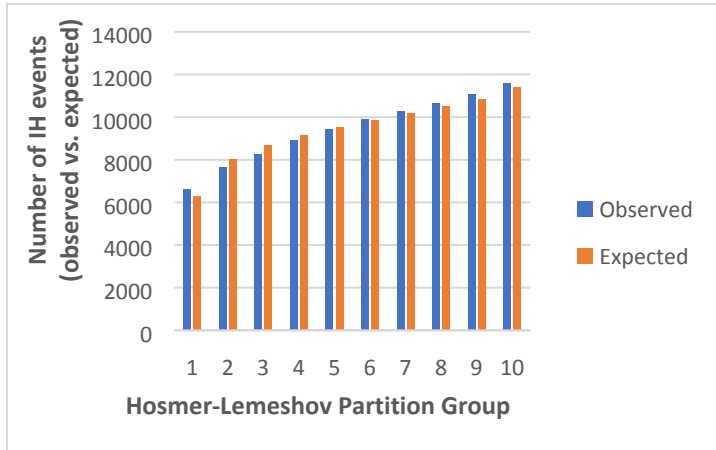

### B. Index hospitalization – non-HCU

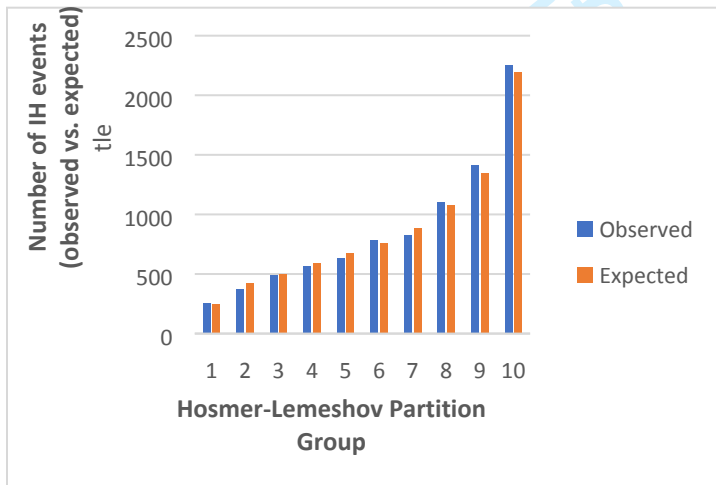

Supplement: 2018-0185-original-submission.pdf [file 2018-0185-original-submission.pdf]
